# Supplementary material for: Semi-crystalline diblock copolymer nano-objects prepared via RAFT alcoholic dispersion polymerization of stearyl methacrylate
Source: Royal Society of Chemistry journal article supplement (doi:10.1039/c4py01664e), 2014-12-19
Supplement: c4py01664e1.pdf [file c4py01664e1.pdf]

Supporting Information for *Polymer Chemistry* article:

## Semi-Crystalline Diblock Copolymer Nano-Objects Prepared via RAFT

### Alcoholic Dispersion Polymerization of Stearyl Methacrylate

M. Semsarilar, N. J. W. Penfold, E. R. Jones and S. P. Armes\*

**Table S1.** Monomer conversions, intensity-average particle diameters, molecular weight data and copolymer morphologies obtained for PDMA<sub>55</sub>-PSMA<sub>x</sub> diblock copolymer nanoparticles synthesized at solids concentrations of 10-30 % w/w via RAFT alcoholic dispersion polymerization of SMA in ethanol at 70 °C.

| solids (%) | target copolymer composition            | SMA % conv. | actual SMA DP | GPC    |           | DLS      |      | TEM              |
|------------|-----------------------------------------|-------------|---------------|--------|-----------|----------|------|------------------|
|            |                                         |             |               | $M_n$  | $M_w/M_n$ | Diameter | PDI  | morphology       |
| 10         | PDMA <sub>55</sub> -PSMA <sub>20</sub>  | 100         | 20            | 14 500 | 1.30      | 200      | 1.00 | spheres          |
|            | PDMA <sub>55</sub> -PSMA <sub>30</sub>  | 97          | 29            | 16 400 | 1.33      | 759      | 1.00 | spheres          |
|            | PDMA <sub>55</sub> -PSMA <sub>35</sub>  | 100         | 35            | 18 800 | 1.31      | 42       | 0.11 | spheres + worms  |
|            | PDMA <sub>55</sub> -PSMA <sub>40</sub>  | 100         | 40            | 19 800 | 1.36      | 245      | 1.00 | spheres + worms  |
|            | PDMA <sub>55</sub> -PSMA <sub>50</sub>  | 100         | 50            | 20 500 | 1.39      | 114      | 0.40 | spheres + worms  |
|            | PDMA <sub>55</sub> -PSMA <sub>60</sub>  | 100         | 60            | 22 600 | 1.44      | 101      | 0.47 | vesicles         |
|            | PDMA <sub>55</sub> -PSMA <sub>80</sub>  | 95          | 76            | 27 800 | 1.42      | 159      | 0.48 | vesicles         |
| 15         | PDMA <sub>55</sub> -PSMA <sub>35</sub>  | 100         | 35            | 18 900 | 1.30      | 68       | 0.13 | spheres + worms  |
|            | PDMA <sub>55</sub> -PSMA <sub>45</sub>  | 100         | 45            | 19 600 | 1.36      | 157      | 0.16 | worms + vesicles |
|            | PDMA <sub>55</sub> -PSMA <sub>55</sub>  | 100         | 55            | 21 100 | 1.38      | 160      | 0.07 | worms + vesicles |
| 20         | PDMA <sub>55</sub> -PSMA <sub>20</sub>  | 100         | 20            | 14 600 | 1.29      | 205      | 1.95 | spheres          |
|            | PDMA <sub>55</sub> -PSMA <sub>30</sub>  | 100         | 30            | 14 800 | 1.34      | 54       | 0.14 | spheres + worms  |
|            | PDMA <sub>55</sub> -PSMA <sub>35</sub>  | 100         | 35            | 19 700 | 1.33      | 85       | 0.14 | worms            |
|            | PDMA <sub>55</sub> -PSMA <sub>40</sub>  | 100         | 40            | 19 200 | 1.35      | 170      | 0.15 | worms + vesicles |
|            | PDMA <sub>55</sub> -PSMA <sub>50</sub>  | 100         | 50            | 20 200 | 1.37      | 143      | 0.13 | worms + vesicles |
|            | PDMA <sub>55</sub> -PSMA <sub>60</sub>  | 100         | 60            | 22 400 | 1.29      | 233      | 1.00 | vesicles         |
|            | PDMA <sub>55</sub> -PSMA <sub>100</sub> | 93          | 93            | 28 800 | 1.49      | 181      | 0.06 | vesicles         |
| 25         | PDMA <sub>55</sub> -PSMA <sub>35</sub>  | 95          | 33            | 19 400 | 1.34      | 102      | 0.14 | worms            |
|            | PDMA <sub>55</sub> -PSMA <sub>45</sub>  | 100         | 45            | 19 700 | 1.37      | 207      | 0.12 | worms + vesicles |
| 30         | PDMA <sub>55</sub> -PSMA <sub>20</sub>  | 100         | 20            | 14 800 | 1.27      | 55       | 0.84 | spheres          |
|            | PDMA <sub>55</sub> -PSMA <sub>30</sub>  | 100         | 30            | 16 500 | 1.35      | 240      | 0.82 | worms + vesicles |
|            | PDMA <sub>55</sub> -PSMA <sub>40</sub>  | 100         | 40            | 19 700 | 1.32      | 112      | 0.13 | worms + vesicles |
|            | PDMA <sub>55</sub> -PSMA <sub>50</sub>  | 100         | 50            | 20 800 | 1.39      | 293      | 0.68 | worms + vesicles |
|            | PDMA <sub>55</sub> -PSMA <sub>60</sub>  | 100         | 60            | 22 700 | 1.47      | 110      | 0.59 | vesicles         |
|            | PDMA <sub>55</sub> -PSMA <sub>80</sub>  | 100         | 80            | 26 900 | 1.49      | 161      | 0.84 | vesicles         |

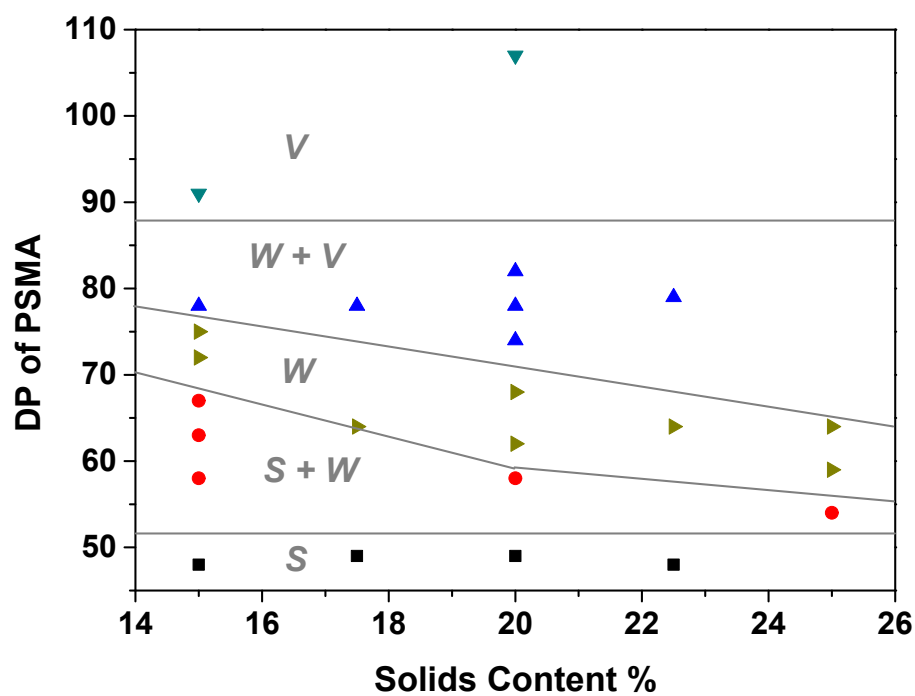

**Figure S1.** ‘Post-mortem’ phase diagram constructed for a PDMA<sub>65</sub>-PSMA<sub>x</sub> RAFT alcoholic dispersion polymerization formulation by systematic variation of the mean target DP of the core-forming PSMA<sub>x</sub> and the total solids concentration.

**Table S2.** Monomer conversions, intensity-average particle diameters, molecular weight data and copolymer morphologies obtained for PDMA<sub>65</sub>-PSMA<sub>x</sub> diblock copolymer nanoparticles synthesized at solids concentrations of 15-25 % w/w by RAFT alcoholic dispersion polymerization of SMA in ethanol at 70 °C.

| solids (%) | target composition                      | SMA % conv. | actual SMA DP | GPC    |           | DLS      |      | TEM              |
|------------|-----------------------------------------|-------------|---------------|--------|-----------|----------|------|------------------|
|            |                                         |             |               | $M_n$  | $M_w/M_n$ | diameter | PDI  | morphology       |
| 15         | PDMA <sub>65</sub> -PSMA <sub>50</sub>  | 96          | 48            | 17 200 | 1.20      | 33       | 0.07 | spheres          |
|            | PDMA <sub>65</sub> -PSMA <sub>60</sub>  | 97          | 58            | 23 000 | 1.15      | 65       | 0.17 | spheres + worms  |
|            | PDMA <sub>65</sub> -PSMA <sub>65</sub>  | 97          | 63            | 24 600 | 1.18      | 73       | 0.16 | spheres + worms  |
|            | PDMA <sub>65</sub> -PSMA <sub>70</sub>  | 96          | 67            | 23 700 | 1.13      | 104      | 0.25 | spheres + worms  |
|            | PDMA <sub>65</sub> -PSMA <sub>75</sub>  | 96          | 72            | 24 600 | 1.18      | 126      | 0.13 | worms            |
|            | PDMA <sub>65</sub> -PSMA <sub>80</sub>  | 93          | 75            | 27 000 | 1.22      | 166      | 0.31 | worms            |
|            | PDMA <sub>65</sub> -PSMA <sub>85</sub>  | 92          | 78            | 25 800 | 1.19      | 149      | 0.16 | worms + vesicles |
|            | PDMA <sub>65</sub> -PSMA <sub>110</sub> | 82          | 91            | 29 600 | 1.24      | 154      | 0.05 | vesicles         |
| 17.5       | PDMA <sub>65</sub> -PSMA <sub>50</sub>  | 99          | 49            | 21 800 | 1.24      | 34       | 0.12 | spheres          |
|            | PDMA <sub>65</sub> -PSMA <sub>70</sub>  | 99          | 64            | 23 900 | 1.29      | 138      | 0.18 | worms            |
|            | PDMA <sub>65</sub> -PSMA <sub>85</sub>  | 92          | 78            | 23 700 | 1.21      | 169      | 0.12 | worms + vesicles |
| 20         | PDMA <sub>65</sub> -PSMA <sub>50</sub>  | 98          | 49            | 19 700 | 1.18      | 37       | 0.09 | spheres          |
|            | PDMA <sub>65</sub> -PSMA <sub>60</sub>  | 97          | 58            | 23 000 | 1.15      | 75       | 0.18 | spheres + worms  |
|            | PDMA <sub>65</sub> -PSMA <sub>65</sub>  | 96          | 62            | 23 800 | 1.15      | 96       | 0.22 | worms            |
|            | PDMA <sub>65</sub> -PSMA <sub>70</sub>  | 97          | 68            | 24 400 | 1.16      | 119      | 0.19 | worms            |
|            | PDMA <sub>65</sub> -PSMA <sub>75</sub>  | 99          | 74            | 26 000 | 1.17      | 130      | 0.19 | worms + vesicles |
|            | PDMA <sub>65</sub> -PSMA <sub>80</sub>  | 97          | 78            | 30 000 | 1.09      | 149      | 0.20 | worms + vesicles |
|            | PDMA <sub>65</sub> -PSMA <sub>85</sub>  | 97          | 82            | 31 100 | 1.10      | 140      | 0.01 | worms + vesicles |
|            | PDMA <sub>65</sub> -PSMA <sub>110</sub> | 97          | 107           | 33 200 | 1.20      | 176      | 0.05 | vesicles         |
| 22.5       | PDMA <sub>65</sub> -PSMA <sub>50</sub>  | 98          | 48            | 20 000 | 1.26      | 56       | 0.23 | spheres          |
|            | PDMA <sub>65</sub> -PSMA <sub>65</sub>  | 99          | 64            | 22 900 | 1.14      | 128      | 0.29 | worms            |
|            | PDMA <sub>65</sub> -PSMA <sub>85</sub>  | 93          | 79            | 23 600 | 1.26      | 174      | 0.08 | worms + vesicles |
| 25         | PDMA <sub>65</sub> -PSMA <sub>55</sub>  | 99          | 54            | 19 600 | 1.21      | 76       | 0.17 | spheres + worms  |
|            | PDMA <sub>65</sub> -PSMA <sub>60</sub>  | 99          | 59            | 20 800 | 1.16      | 110      | 0.21 | worms            |
|            | PDMA <sub>65</sub> -PSMA <sub>65</sub>  | 99          | 64            | 24 000 | 1.26      | 136      | 0.19 | worms            |

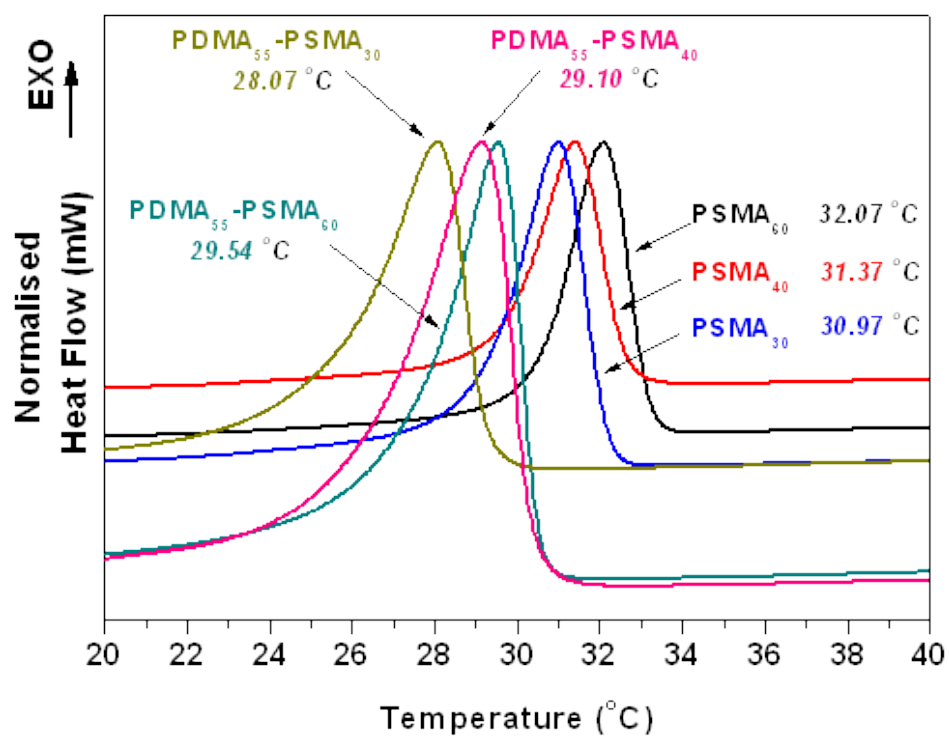

**Figure S2.** DSC traces obtained for PDMA<sub>55</sub>-PSMA<sub>x</sub> diblock copolymer nano-objects prepared by RAFT alcoholic dispersion polymerization of SMA at 70 °C. The maxima indicate  $T_m$ .
